# Supplementary material
Source: PubMed Central journal article supplement (PMC4165794)
Supplement: NIHMS616742-supplement-Supp_Material.pdf [file NIHMS616742-supplement-Supp_Material.pdf]

## Supporting Material

CHARMM-GUI *Membrane Builder* Toward Realistic Biological Membrane Simulations

Emilia L. Wu, Xi Cheng, Sunhwan Jo, Huan Rui, Kevin C. Song, Eder M. Dávila-Contreras, Yifei Qi, Jumin Lee, Viviana Monje-Galvan, Richard M. Venable, Jeffery B. Klauda, and Wonpil Im

**Table S1.** List of lipid molecules available in *Membrane Builder* with corresponding lipid information.

| Lipid Class                             | Lipid Name | Tail Info             |
|-----------------------------------------|------------|-----------------------|
| Sterols                                 | CHL1       |                       |
|                                         | ERG        |                       |
| PA Lipids<br>(phosphatidic acid)        | DLPA       | 12:0 / 12:0           |
|                                         | DMPA       | 14:0 / 14:0           |
|                                         | DPPA       | 16:0 / 16:0           |
|                                         | DSPA       | 18:0 / 18:0           |
|                                         | POPA       | 16:0 / 18:1 (9)       |
|                                         | PLPA       | 16:0 / 18:2 (9,12)    |
|                                         | SOPA       | 18:0 / 18:1 (9)       |
|                                         | SLPA       | 18:0 / 18:2 (9,12)    |
|                                         | DXPA       | 16:1 (9) / 16:1 (9)   |
|                                         | YOPA       | 16:1 (9) / 18:1 (9)   |
|                                         | DOPA       | 18:1 (9) / 18:1 (9)   |
|                                         | DGPA       | 20:1 (11) / 20:1 (11) |
|                                         | DEPA       | 22:1 (13) / 22:1 (13) |
|                                         | DNPA       | 24:1 (15) / 24:1 (15) |
| PC Lipids<br>(phosphatidylcholine)      | DLPC       | 12:0 / 12:0           |
|                                         | DMPC       | 14:0 / 14:0           |
|                                         | DPPC       | 16:0 / 16:0           |
|                                         | DSPC       | 18:0 / 18:0           |
|                                         | POPC       | 16:0 / 18:1 (9)       |
|                                         | PLPC       | 16:0 / 18:2 (9,12)    |
|                                         | SOPC       | 18:0 / 18:1 (9)       |
|                                         | SLPC       | 18:0 / 18:2 (9,12)    |
|                                         | DYPC       | 16:1 (9) / 16:1 (9)   |
|                                         | YOPC       | 16:1 (9) / 18:1 (9)   |
|                                         | DOPC       | 18:1 (9) / 18:1 (9)   |
|                                         | DGPC       | 20:1 (11) / 20:1 (11) |
|                                         | DEPC       | 22:1 (13) / 22:1 (13) |
|                                         | DNPC       | 24:1 (15) / 24:1 (15) |
| PE Lipids<br>(phosphatidylethanolamine) | DLPE       | 12:0 / 12:0           |
|                                         | DMPE       | 14:0 / 14:0           |
|                                         | DPPE       | 16:0 / 16:0           |
|                                         | DSPE       | 18:0 / 18:0           |
|                                         | PYPE       | 16:0 / 16:1 (9)       |
|                                         | POPE       | 16:0 / 18:1 (9)       |
|                                         | PLPE       | 16:0 / 18:2 (9,12)    |
|                                         | SOPE       | 18:0 / 18:1 (9)       |
|                                         | SLPE       | 18:0 / 18:2 (9,12)    |

|                                     |        |                       |
|-------------------------------------|--------|-----------------------|
|                                     | DYPE   | 16:1 (9) / 16:1 (9)   |
|                                     | YOPE   | 16:1 (9) / 18:1 (9)   |
|                                     | OSPE   | 18:1 (9) / 16:1 (9)   |
|                                     | DOPE   | 18:1 (9) / 18:1 (9)   |
|                                     | DGPE   | 20:1 (11) / 20:1 (11) |
|                                     | DEPE   | 22:1 (13) / 22:1 (13) |
|                                     | DNPE   | 24:1 (15) / 24:1 (15) |
| PG Lipids<br>(phosphatidylglycero)  | DLPG   | 12:0 / 12:0           |
|                                     | DMPG   | 14:0 / 14:0           |
|                                     | DPPG   | 16:0 / 16:0           |
|                                     | DSPG   | 18:0 / 18:0           |
|                                     | PSPG   | 16:0 / 16:1 (9)       |
|                                     | POPG   | 16:0 / 18:1 (9)       |
|                                     | PLPG   | 16:0 / 18:2 (9,12)    |
|                                     | SOPG   | 18:0 / 18:1 (9)       |
|                                     | SLPG   | 18:0 / 18:2 (9,12)    |
|                                     | DXPG   | 16:1 (9) / 16:1 (9)   |
|                                     | DOPG   | 18:1 (9) / 18:1 (9)   |
|                                     | DGPG   | 20:1 (11) / 20:1 (11) |
|                                     | DEPG   | 22:1 (13) / 22:1 (13) |
|                                     | DNPG   | 24:1 (15) / 24:1 (15) |
| PS Lipids<br>(phosphatidylserine)   | DLPS   | 12:0 / 12:0           |
|                                     | DMPS   | 14:0 / 14:0           |
|                                     | DPPS   | 16:0 / 16:0           |
|                                     | DSPS   | 18:0 / 18:0           |
|                                     | POPS   | 16:0 / 18:1 (9)       |
|                                     | PLPS   | 16:0 / 18:2 (9,12)    |
|                                     | SOPS   | 18:0 / 18:1 (9)       |
|                                     | SLPS   | 18:0 / 18:2 (9,12)    |
|                                     | DXPS   | 16:1 (9) / 16:1 (9)   |
|                                     | YOPS   | 16:1 (9) / 18:1 (9)   |
|                                     | DOPS   | 18:1 (9) / 18:1 (9)   |
|                                     | DGPS   | 20:1 (11) / 20:1 (11) |
|                                     | DEPS   | 22:1 (13) / 22:1 (13) |
|                                     | DNPS   | 24:1 (15) / 24:1 (15) |
| PI Lipids<br>(phosphatidylinositol) | DMPI   | 14:0 / 14:0           |
|                                     | DMPI13 | 14:0 / 14:0           |
|                                     | DMPI14 | 14:0 / 14:0           |
|                                     | DMPI15 | 14:0 / 14:0           |
|                                     | DMPI24 | 14:0 / 14:0           |
|                                     | DMPI25 | 14:0 / 14:0           |
|                                     | DMPI33 | 14:0 / 14:0           |
|                                     | DMPI34 | 14:0 / 14:0           |

|                            |        |                                  |
|----------------------------|--------|----------------------------------|
|                            | DMPI35 | 14:0 / 14:0                      |
|                            | PYPI   | 16:0 / 16:1 (9)                  |
|                            | POPI   | 16:0 / 18:1 (9)                  |
|                            | POPI13 | 16:0 / 18:1 (9)                  |
|                            | POPI14 | 16:0 / 18:1 (9)                  |
|                            | POPI15 | 16:0 / 18:1 (9)                  |
|                            | POPI24 | 16:0 / 18:1 (9)                  |
|                            | POPI25 | 16:0 / 18:1 (9)                  |
|                            | POPI33 | 16:0 / 18:1 (9)                  |
|                            | POPI34 | 16:0 / 18:1 (9)                  |
|                            | POPI35 | 16:0 / 18:1 (9)                  |
|                            | PLPI   | 16:0 / 18:2 (9,12)               |
|                            | PLPI13 | 16:0 / 18:2 (9,12)               |
|                            | PLPI14 | 16:0 / 18:2 (9,12)               |
|                            | PLPI15 | 16:0 / 18:2 (9,12)               |
|                            | PLPI24 | 16:0 / 18:2 (9,12)               |
|                            | PLPI25 | 16:0 / 18:2 (9,12)               |
|                            | PLPI33 | 16:0 / 18:2 (9,12)               |
|                            | PLPI34 | 16:0 / 18:2 (9,12)               |
|                            | PLPI35 | 16:0 / 18:2 (9,12)               |
|                            | PNPI   | 16:0 / 18:3 (9,12,15)            |
|                            | PNPI13 | 16:0 / 18:3 (9,12,15)            |
|                            | PNPI14 | 16:0 / 18:3 (9,12,15)            |
|                            | PNPI15 | 16:0 / 18:3 (9,12,15)            |
|                            | PNPI24 | 16:0 / 18:3 (9,12,15)            |
|                            | PNPI25 | 16:0 / 18:3 (9,12,15)            |
|                            | PNPI33 | 16:0 / 18:3 (9,12,15)            |
|                            | PNPI34 | 16:0 / 18:3 (9,12,15)            |
|                            | PNPI35 | 16:0 / 18:3 (9,12,15)            |
|                            | SAPI   | 18:0 / 20:4 (5,7,9,11)           |
|                            | SAPI13 | 18:0 / 20:4 (5,7,9,11)           |
|                            | SAPI14 | 18:0 / 20:4 (5,7,9,11)           |
|                            | SAPI15 | 18:0 / 20:4 (5,7,9,11)           |
|                            | SAPI24 | 18:0 / 20:4 (5,7,9,11)           |
|                            | SAPI25 | 18:0 / 20:4 (5,7,9,11)           |
|                            | SAPI33 | 18:0 / 20:4 (5,7,9,11)           |
|                            | SAPI34 | 18:0 / 20:4 (5,7,9,11)           |
|                            | SAPI35 | 18:0 / 20:4 (5,7,9,11)           |
| CL Lipids<br>(cardiolipin) | TMCL1  | 14:0, 14:0 / 14:0, 14:0          |
|                            | TMCL2  | 14:0, 14:0 / 14:0, 14:0          |
|                            | PMCL1  | 16:0 (9cyc10), 16:0 / 16:0, 16:0 |
|                            | PMCL2  | 16:0 (9cyc10), 16:0 / 16:0, 16:0 |
|                            | PVCL2  | 16:0, 18:1(11) / 16:0, 18:1 (11) |

|                                             |                                     |                                                        |
|---------------------------------------------|-------------------------------------|--------------------------------------------------------|
|                                             | TXCL1                               | 16:1 (9), 16:1 (9) /16:1 (9), 16:1 (9)                 |
|                                             | TXCL2                               | 16:1 (9), 16:1 (9) /16:1 (9), 16:1 (9)                 |
|                                             | TOCL1                               | 18:1 (9), 18:1 (9) /18:1 (9), 18:1 (9)                 |
|                                             | TOCL2                               | 18:1 (9), 18:1 (9) /18:1 (9), 18:1 (9)                 |
|                                             | LOACL1                              | 18:2 (9,12), 18:2 (9,12) / 18:1 (9), 18:2 (9,12)       |
|                                             | LOACL2                              | 18:2 (9,12), 18:2 (9,12) / 18:1 (9), 18:2 (9,12)       |
|                                             | LOCCL1                              | 18:2 (9,12), 18:2 (9,12) / 18:2 (9,12), 18:1 (9)       |
|                                             | LOCCL2                              | 18:2 (9,12), 18:2 (9,12) / 18:2 (9,12), 18:1 (9)       |
|                                             | TLCL1                               | 18:2 (9,12), 18:2 (9,12) / 18:2 (9,12), 18:2 (9,12)    |
|                                             | TLCL2                               | 18:2 (9,12), 18:2 (9,12) / 18:2 (9,12), 18:2 (9,12)    |
|                                             | LNCCL1                              | 18:2 (9,12), 18:2 (9,12) / 18:2 (9,12), 18:3 (9,12,15) |
|                                             | LNCCL2                              | 18:2 (9,12), 18:2 (9,12) / 18:2 (9,12), 18:3 (9,12,15) |
|                                             | LNACL1                              | 18:2 (9,12), 18:2 (9,12) / 18:3 (9,12,15), 18:2 (9,12) |
|                                             | LNACL2                              | 18:2 (9,12), 18:2 (9,12) / 18:3 (9,12,15), 18:2 (9,12) |
|                                             | LNDCL1                              | 18:2 (9,12), 18:3 (9,12,15) / 18:2 (9,12), 18:2 (9,12) |
|                                             | LNDCL2                              | 18:2 (9,12), 18:3 (9,12,15) / 18:2 (9,12), 18:2 (9,12) |
|                                             | LNBL1                               | 18:3 (9,12,15), 18:2 (9,12) / 18:2 (9,12), 18:2 (9,12) |
|                                             | LNBL2                               | 18:3 (9,12,15), 18:2 (9,12) / 18:2 (9,12), 18:2 (9,12) |
| PUFA Lipids<br>(polyunsaturated fatty acid) | SAPA                                | 18:0 / 20:4 (5,8,11,14)                                |
|                                             | SAPC                                | 18:0 / 20:4 (5,8,11,14)                                |
|                                             | SAPE                                | 18:0 / 20:4 (5,8,11,14)                                |
|                                             | SAPG                                | 18:0 / 20:4 (5,8,11,14)                                |
|                                             | SAPS                                | 18:0 / 20:4 (5,8,11,14)                                |
|                                             | SDPA                                | 18:0 / 22:6 (4,7,10,13,16,19)                          |
|                                             | SDPC                                | 18:0 / 22:6 (4,7,10,13,16,19)                          |
|                                             | SDPE                                | 18:0 / 22:6 (4,7,10,13,16,19)                          |
|                                             | SDPG                                | 18:0 / 22:6 (4,7,10,13,16,19)                          |
|                                             | SDPS                                | 18:0 / 22:6 (4,7,10,13,16,19)                          |
|                                             | DAPA                                | 20:4 (5,8,11,14) / 20:4 (5,8,11,14)                    |
|                                             | DAPC                                | 20:4 (5,8,11,14) / 20:4 (5,8,11,14)                    |
|                                             | DAPE                                | 20:4 (5,8,11,14) / 20:4 (5,8,11,14)                    |
|                                             | DAPG                                | 20:4 (5,8,11,14) / 20:4 (5,8,11,14)                    |
| DAPS                                        | 20:4 (5,8,11,14) / 20:4 (5,8,11,14) |                                                        |
| SM Lipids<br>(sphingo)                      | PSM                                 | 18:1 / 16:0                                            |
|                                             | SSM                                 | 18:1 / 18:0                                            |
|                                             | ASM                                 | 18:1 / 20:0                                            |
|                                             | BSM                                 | 18:1 / 22:0                                            |
|                                             | 23SM                                | 18:1 / 23:0                                            |
|                                             | LSM                                 | 18:1 / 24:0                                            |
|                                             | OSM                                 | 18:1 / 18:1 (9)                                        |
|                                             | NSM                                 | 18:1 / 24:1 (15)                                       |
|                                             | CER160                              | 18:1 / 16:0                                            |
|                                             | CER180                              | 18:1 / 18:0                                            |

|                  |        |                       |
|------------------|--------|-----------------------|
|                  | CER181 | 18:1 / 18:1           |
|                  | CER200 | 18:1 / 20:0           |
|                  | CER220 | 18:1 / 22:0           |
|                  | CER240 | 18:1 / 24:0           |
|                  | CER241 | 18:1 / 24:1           |
| Bacterial Lipids | QMPE   | 15:0 / 16:0 (9cyc10)  |
|                  | PMPE   | 16:0 / 16:0 (9cyc10)  |
|                  | PMPG   | 16:0 / 16:0 (9cyc10)  |
|                  | PPPE   | 16:0 / 16:1 (9)       |
|                  | PVPE   | 16:0 / 18:1 (11)      |
|                  | PVPG   | 16:0 / 18:1 (11)      |
|                  | APPC   | 1ME(antiso) 15:0/16:0 |
|                  | IPPC   | 1ME(iso) 15:0/16:0    |
|                  | PHPC   | 4ME 16:0              |
